# Supplementary material for: Exploring the activity of the enzyme 11β-hydroxylase in the polycystic ovary syndrome
Source: publisher site journal article supplement (doi:10.1515/hmbci-2019-0048), 2020-01-10
Supplement: Supplementary file 1 [file Supplementary Table 1_R1.docx]

**Supplementary Table 1.** Comparisons of clinical and anthropometric characteristics of normal cycling controls and normo-and hyperandrogenemic patients with polycystic ovary syndrome according to ethnicities*

| **Variable**** | **Controls** | |  | **NA-PCOS** | |  | **HA-PCOS** | |  | | **All PCOS** | |  |
| --- | --- | --- | --- | --- | --- | --- | --- | --- | --- | --- | --- | --- | --- |
| **Median** | **IQR** |  | **Median** | **IQR** |  | **Median** | **IQR** | |  | **Median** | **IQR** |  |
| Age (yo) | 30.0 | (27.0-34.0) |  | 29.5 | (26.0-32.0) |  | 27.0 | (24.0-31.0) | |  | 28.0 | (25.0-32.0)b,e,j |  |
| CA | 30.0 | (27.0-34.0) |  | 29.5 | (25.7-31.6) |  | 28.0 | (25.0-31.0) | |  | 28.0 | (25.0-31.0) |  |
| AD | 29.9 | (28.4-31.9) |  | 28.0 | (26.0-32.0) |  | 27.0 | (24.0-31.0) | |  | 27.0 | (24.0-32.0) |  |
| OT | 30.0 | (26.0-33.0) | p= 0.738 | 31.0 | (27.5-34.0) | p= 0.908 | 27.0 | (22.0-32.0) | | p= 0.777 | 26.9 | (21.8-31.6) | p= 0.667 |
|  |  |  |  |  |  |  |  |  | |  |  |  |  |
| SBP (mmHg) | 117.5 | (109.6-117.5) |  | 120.0 | (110.0-120.0) |  | 117.5 | (109.6-117.5) | |  | 119.9 | (109.8-119.9)d,e |  |
| CA | 117.5 | (109.6-117.5) |  | 120.0 | (110.0-120.0) |  | 117.5 | (109.6-117.5) | |  | 119.9 | (109.8-119.9) |  |
| AD | 117.4 | (109.6-117.4) |  | 120.0 | (119.7-120.0) |  | 117.4 | (117.4-128.8) | |  | 119.9 | (118.8-119.9) |  |
| OT | 117.4 | (109.6-117.4) | p= 0.312 | 105.0 | (98.0-115.0) | p= 0.079 | 117.4 | (104.7-125.8) | | p= 0.141 | 119.9 | (100.0-122.9) | p= 0.059 |
|  |  |  |  |  |  |  |  |  | |  |  |  |  |
| DBP (mmHg) | 69.9 | (69.9-79.9) |  | 79.4 | (69.2-79.4) |  | 79.4 | (69.2-79.4) | |  | 79.9 | (69.9-79.9)b,e |  |
| CA | 69.9 | (69.9-79.9) |  | 78.0 | (70.0-80.0) |  | 79.4 | (69.1-79.4) | |  | 79.9 | (69.8-79.9) |  |
| AD | 69.8 | (69.8-79.9) |  | 80.0 | (79.0-82.5) |  | 79.4 | (69.1-79.4) | |  | 79.4 | (61.1-79.4) |  |
| OT | 69.8 | (69.8-79.9) | p= 0.885 | 69.1 | (64.5-79.4) | p= 0.025 | 79.4 | (70.7-79.43) | | p= 0.475 | 76.9 | (69.8-79.9) | p= 0.108 |
|  |  |  |  |  |  |  |  |  | |  |  |  |  |
| BW (Kg) | 61.6 | (54.9-69.2) |  | 64.5 | (57.5-77.6) |  | 72.4 | (61.6-85.1) | |  | 70.8 | (60.2-83.1)a,b,e,i |  |
| CA | 61.6 | (54.9-69.1) |  | 63.0 | (56.2-77.6) |  | 72.4 | (60.2-83.4) | |  | 70.7 | (58.8-83.1) |  |
| AD | 61.6 | (52.4-69.1) |  | 79.2 | (72.4-90.2) |  | 83.6 | (64.0-94.2) | |  | 83.0 | (61.1-93.0) |  |
| OT | 65.6 | (59.9-67.4) | p= 0.513 | 67.60 | (60.2-70.7) | p= 0.024 | 75.8 | (63.0-87.0) | | p= 0.44 | 70.7 | (60.2-83.1) | p= 0.006 |
|  |  |  |  |  |  |  |  |  | |  |  |  |  |
| BMI (Kg/m2) | 23.8 | (21.5-26.4) |  | 22.9 | (22.9-30.2) |  | 28.2 | (24.5-33.1) | |  | 27.5 | (24.0-32.3)a,b,e,j |  |
| CA | 23.7 | (21.3-26.3) |  | 24.5 | (22.3-30.2) |  | 27.5 | 23.9-31.6) | |  | 26.9 | (23.4-30.9) |  |
| AD | 22.3 | (20.8-27.5) |  | 32.1 | (29.9-36.4) |  | 33.4 | (25.9-36.7) | |  | 33.1 | (26.5-36.4) |  |
| OT | 24.5 | (23.4-26.9) | p= 0.105 | 24.7 | (22.3-28.5) | p= 0.004 | 29.5 | (23.9-35.4) | | p= 0.002 | 28.8 | (23.9-34.6) | p= <0.001 |
|  |  |  |  |  |  |  |  |  | |  |  |  |  |
| WC (cm) | 73.6 | (68.0-79.0) |  | 79.4 | (61.2-87.1) |  | 85.1 | (75.8-97.7) | |  | 83.2 | (72.4-95.5)a,b,e,h |  |
| CA | 70.8 | (67.6-77.6) |  | 75.8 | (69.1-83.1) |  | 83.1 | (72.4-93.3) | |  | 81.2 | (72.4-91.2) |  |
| AD | 71.9 | (64.9-78.3) |  | 91.2 | (85.1-107.1) |  | 92.0 | (81.0-103.0) | |  | 91.2 | (83.1-102.3) |  |
| OT | 75.8 | (70.7-77.6) | p= 0.131 | 80.0 | (72.0-96.0) | p= 0.004 | 91.2 | (77.6-102.3) | | p= 0.001 | 89.1 | (75.8-100.0) | p= <0.001 |
|  |  |  |  |  |  |  |  |  | |  |  |  |  |
| WHR | 0.7 | (0.7-0.8) |  | 0.7 | (0.7-0.8) |  | 0.8 | (0.7-0.8) | |  | 0.8 | (0.7-0.8)a,b,e,i |  |
| CA | 0.7 | (0.7-0.7) |  | 0.7 | (0.7-0.8) |  | 0.7 | (0.7-0.8) | |  | 0.7 | (0.7-0.8) |  |
| AD | 0.7 | (0.6-0.7) |  | 0.8 | (0.7-0.9) |  | 0.8 | (0.7-0.8) | |  | 0.8 | (0.7-0.8) |  |
| OT | 0.7 | (0.7-0.8) | p= 0.181 | 0.7 | (0.7-0.9) | p= 0.022 | 0.8 | (0.7-0.8) | | p= <0.001 | 0.8 | (0.7-0.8) | p= <0.001 |
|  |  |  |  |  |  |  |  |  | |  |  |  |  |
| CI (%, pg/ml.nmol) | 1.1 | (1.0-1.1) |  | 1.1 | (1.1-1.2) |  | 1.1 | (1.1-1.2) | |  | 1.1 | (1.1-1.2)a,b,e,i |  |
| CA | 1.0 | (1.0-1.1) |  | 1.1 | (1.0-1.1) |  | 1.1 | (1.1-1.2) | |  | 1.1 | (1.1-1.2) |  |
| AD | 1.0 | (1.0-1.1) |  | 1.2 | (1.1-1.3) |  | 1.2 | (1.1-1.2) | |  | 1.1 | (1.1-1.2) |  |
| OT | 1.1 | (1.0-1.1) | p=0.156 | 1.2 | (1.1-1.2) | p= 0.002 | 1.2 | (1.1-1.2) | | p= <0.001 | 1.2 | (1.1-1.2) | p= <0.001 |
|  |  |  |  |  |  |  |  |  | |  |  |  |  |
| FM (%) | 30.3 | (25.7-33.7) |  | 33.1 | (28.2-38.9) |  | 37.1 | (30.9-42.6) | |  | 36.8 | (30.1-42.3)a,b,e,h,i |  |
| CA | 30.3 | (25.4-33.5) |  | 30.9 | (27.5-38.0) |  | 36.4 | (30.2-41.6) | |  | 35.4 | (28.8-40.7) |  |
| AD | 29.0 | (26.2-34.4) |  | 41.1 | (39.2-44.8) |  | 42.7 | (36.7-46.3) | |  | 42.3 | (37.0-46.0) |  |
| OT | 30.9 | (28.8-34.6) | p= 0.159 | 33.8 | (29.5-37.1) | p= 0.007 | 38.9 | (31.6-43.6) | | p= <0.001 | 37.4 | (31.1-42.7) | p= <0.001 |
|  |  |  |  |  |  |  |  |  | |  |  |  |  |
| VAI | 1.1 | (0.7-1.5) |  | 1.2 | (0.9-2.1) |  | 1.9 | (1.1-3.1) | |  | 1.7 | (1.1-2.9)b,c,e,g,h |  |
| CA | 1.0 | (0.7-1.4) |  | 1.2 | (0.8-1.8) |  | 1.8 | (1.0-3.1) | |  | 1.6 | (1.2-2.7) |  |
| AD | 1.0 | (0.8-1.7) |  | 1.5 | (1.3-5.1) |  | 1.9 | (1.2-2.8) | |  | 1.8 | (1.3-2.9) |  |
| OT | 1.3 | (0.9-2.2) | p= 0.198 | 1.6 | (0.9-3.2) | p= 0.081 | 2.0 | (1.1-4.7) | | p= <0.001 | 2.0 | (1.1-4.7) | p= 0.137 |
|  |  |  |  |  |  |  |  |  | |  |  |  |  |
| LAP | 12.1 | (6.6-20.9) |  | 21.3 | (10.7-36.3) |  | 37.3 | (17.2-64.3) | |  | 32.8 | (14.6-58.8)a,b,e,g,h |  |
| CA | 11.9 | (6.6-20.7) |  | 19.7 | (7.8-34.5) |  | 36.6 | (16.4-64.0) | |  | 30.0 | (12.8-57.0) |  |
| AD | 14.4 | (4.5-19.8) |  | 44.2 | (23.2-86.6) |  | 40.3 | (21.9-56.8) | |  | 39.8 | (24.5-60.2) |  |
| OT | 13.8 | (11.2-25.7) | p= 0.223 | 22.3 | (12.5-40.7) | p= 0.033 | 39.8 | (19.4-91.2) | | p= <0.001 | 37.1 | (16.9-91.2) | p= 0.032 |

*Results are given in median and interquatile range (IQR); CA= Caucasian, AD= African descendent, OT= Other races; **All abbreviations were given along the text; ***Kruskal-Wallis H test followed by Dunn-Bonferroni post hoc test

a= controls vs NA-PCOS, p <0.01; b= controls vs PCOS, p <0.01; c= controls vs NA-PCOS, p <0.05; d= controls vs PCOS, p <0.05; e= controls vs HA-PCOS, p <0.01; f= controls vs HA-PCOS, p <0.05; g= NA-PCOS vs PCOS, p <0.01; h= NA-PCOS vs PCOS, p <0.05; i= NA-PCOS vs HA-PCOS, p <0.01; j= NA-PCOS vs HA-PCOS, p <0.05; k= HA-PCOS vs PCOS, p <0.01; i= HA-PCOS vs PCOS, p <0.05.

**p-value compares the influence of ethnicities within each variable
