# Supplementary material for: Exploring the activity of the enzyme 11β-hydroxylase in the polycystic ovary syndrome
Source: publisher site journal article supplement (doi:10.1515/hmbci-2019-0048), 2020-01-10
Supplement: Supplementary file 3 [file Supplementary Table 3_R1.docx]

**Supplementary Table 3.** Comparisons of hormonal characteristics of normal cycling women, and normoandrogenemic and hyperandrogenemic polycystic ovary syndrome women.*

| **Variable**** | **Controls** | |  | **NA-PCOS** | |  | **HA-PCOS** | |  | **All PCOS** | |  |
| --- | --- | --- | --- | --- | --- | --- | --- | --- | --- | --- | --- | --- |
| **Median** | **IQR** |  | **Median** | **IQR** |  | **Median** | **IQR** |  | **Median** | **IQR** |  |
| TSH | 1.9 | (1.5-2.6) |  | 1.8 | (1.4-2.5) |  | 1.9 | (1.4-2.7) |  | 1.9 | (1.3-2.6)NS*** |  |
| CA | 1.4 | (1.4-2.5) |  | 1.8 | (1.3-2.4) |  | 1.9 | (1.3-2.6) |  | 1.9 | (1.4-2.6) |  |
| AD | 1.9 | (1.5-2.6) |  | 1.7 | (0.7-2.0) |  | 2.0 | (1.2-2.5) |  | 1.9 | (1.0-2.5) |  |
| OT | 2.2 | (1.5-2.7) | p= 0.871**** | 2.4 | (1.5-2.7) | p= 0.316 | 2.1 | (1.2-2.7) | p= 0.895 | 2.2 | (1.3-2.7) | p= 0.493 |
|  |  |  |  |  |  |  |  |  |  |  |  |  |
| FT4 (pmol/l) | 14.1 | (12.5-15.4) |  | 14.1 | (12.6-15.3) |  | 14.0 | (12.3-15.5) |  | 14.1 | (12.5-14.4)NS |  |
| CA | 14.3 | (12.6-15.6) |  | 13.8 | (12.5-15.4) |  | 13.8 | (12.3-15.1) |  | 13.8 | (12.3-15.1) |  |
| AD | 12.8 | (12.0-14.5) |  | 12.8 | (11.7-14.8) |  | 14.2 | (12.5-15.1) |  | 14.1 | (12.0-15.1) |  |
| OT | 15.5 | (14.5-16.0) | p= 0.011 | 14.1 | (14.1-14.8) | p= 0.392 | 14.1 | (12.0-15.8) | p= 0.748 | 14.2 | (12.5-15.4) | p= 0.701 |
|  |  |  |  |  |  |  |  |  |  |  |  |  |
| F (nmol/l) | 316.2 | (234.4-426.5) |  | 301.7 | (231.6-413.0) |  | 323.6 | (234.4-426.5) |  | 325.4 | (234.4-432.3)NS |  |
| CA | 317.5 | (235.3-428.4) |  | 301.0 | (233.4-420.6) |  | 332.3 | (239.3-445.2) |  | 328.3 | (237.2-443.7) |  |
| AD | 311.1 | (248.0-384.5) |  | 288.3 | (212.2-496.3) |  | 324.0 | (231.0-369.4) |  | 315.9 | (223.6-369.7) |  |
| OT | 342.2 | (200.5-455.4) | p= 0.792 | 281.9 | (231.0-322.5) | p= 0.656 | 337.8 | (224.4-417.8) | p= 0.472 | 325.5 | (226.2-414.1) | p= 0.273 |
|  |  |  |  |  |  |  |  |  |  |  |  |  |
| S (nmol/l) | 6.0 | (4.5-7.9) |  | 6.0 | (4.5-8.0) |  | 6.6 | (4.5-9.2) |  | 6.3 | (4.5-8.9)NS |  |
| CA | 6.2 | (4.5-8.0) |  | 6.3 | (4.8-8.0) |  | 6.9 | (4.5-9.1) |  | 6.6 | (4.8-8.9) |  |
| AD | 5.4 | (4.8-6.9) |  | 4.3 | (3.1-5.7) |  | 6.4 | (4.0-9.4) |  | 5.7 | (4.0-8.9) |  |
| OT | 4.5 | (3.1-6.0) | p= 0.254 | 6.3 | (5.1-7.7) | p= 0.051 | 5.4 | (4.0-8.3) | p= 0.195 | 5.4 | (4.0-8.3) | p= 0.158 |
|  |  |  |  |  |  |  |  |  |  |  |  |  |
| F/S (ratio) | 53.8 | (38.2-74.4) |  | 50.8 | (36.7-65.9) |  | 50.1 | (32.3-69.2) |  | 50.1 | (33.1-69.2)NS |  |
| CA | 52.4 | (37.1-69.1) |  | 48.8 | (36.7-66.0) |  | 49.4 | (32.3-67.8) |  | 48.9 | (33.1-66.0) |  |
| AD | 51.2 | (39.8-66.0) |  | 62.2 | (53.4-69.2) |  | 48.7 | (31.8-68.0) |  | 53.7 | (32.3-69.1) |  |
| OT | 70.8 | (43.6-75.8) | p= 0.429 | 52.4 | (44.9-59.7) | p= 0.495 | 55.9 | (33.7-75.8) | p= 0.498 | 54.9 | (33.8-69.1) | p= 0.685 |
|  |  |  |  |  |  |  |  |  |  |  |  |  |
| A4 (nmol/l) | 4.7 | (3.8-6.9) |  | 5.2 | (3.8-6.7) |  | 9.7 | (6.9-13.2) |  | 8.3 | (5.5-11.7)b,e,i,j,k |  |
| CA | 4.8 | (3.8-6.6) |  | 5.4 | (3.8-6.9) |  | 10.1 | (7.6-13.9) |  | 8.4 | (5.5-12.0) |  |
| AD | 4.1 | (3.3-6.9) |  | 5.3 | (3.3-6.1) |  | 7.4 | (5.9-11.1) |  | 6.5 | (4.7-10.9) |  |
| OT | 6.0 | (4.3-6.9) | p= 0.611 | 4.8 | (3.9-5.1) | p= 0.765 | 9.7 | (7.1-12.9) | p= 0.007 | 8.3 | (5.2-11.9) | p= 0.083 |
|  |  |  |  |  |  |  |  |  |  |  |  |  |
| Total T (nmol/l) | 0.90 | (0.70-1.25) |  | 0.96 | (0.69-1.34) |  | 2.06 | (1.53-2.60) |  | 1.80 | (1.2-2.4)b,e,g,i,l |  |
| CA | 0.90 | (0.68-1.23) |  | 0.98 | (0.68-1.34) |  | 2.01 | (1.51-2.50) |  | 1.80 | (1.16-2.31) |  |
| AD | 0.81 | (0.59-1.12) |  | 0.68 | (0.68-0.90) |  | 2.04 | (1.40-2.52) |  | 1.93 | (1.30-2.46) |  |
| OT | 0.92 | (0.68-1.10) | p= 0.544 | 1.00 | (0.75-1.29) | p= 0.743 | 2.16 | (1.70-2.78) | p= 0.346 | 1.90 | (1.36-2.72) | p= 0.139 |

*Results are given in median and interquatile range (IQR); CA= Caucasian, AD= African descendent, OT= Other races; **All abbreviations were given along the text; ***Kruskal-Wallis H test followed by Dunn-Bonferroni post hoc test

a= controls vs NA-PCOS, p <0.01; b= controls vs PCOS, p <0.01; c= controls vs NA-PCOS, p <0.05; d= controls vs PCOS, p <0.05; e= controls vs HA-PCOS, p <0.01; f= controls vs HA-PCOS, p <0.05; g= NA-PCOS vs PCOS, p <0.01; h= NA-PCOS vs PCOS, p <0.05; i= NA-PCOS vs HA-PCOS, p <0.01; j= NA-PCOS vs HA-PCOS, p <0.05; k= HA-PCOS vs PCOS, p <0.01; i= HA-PCOS vs PCOS, p <0.05.

****p-value compares the influence of ethnicities within each variable
