# Supplementary material for: Exploring the activity of the enzyme 11β-hydroxylase in the polycystic ovary syndrome
Source: publisher site journal article supplement (doi:10.1515/hmbci-2019-0048), 2020-01-10
Supplement: Supplementary file 4 [file Supplementary Table 4_R1.docx]

**Supplementary Table 4.** Comparisons of hormonal characteristics of normal cycling women, and normoandrogenemic and hyperandrogenemic polycystic ovary syndrome women.*

| **Variable**** | **Controls** | |  | **NA-PCOS** | |  | **HA-PCOS** | |  | | **All PCOS** | |  |
| --- | --- | --- | --- | --- | --- | --- | --- | --- | --- | --- | --- | --- | --- |
| **Median** | **IQR** |  | **Median** | **IQR** |  | **Median** | **IQR** | |  | **Median** | **IQR** |  |
| FT (pmol/l) | 0.01 | (0.01-0.02) |  | 0.01 | (0.01-0.01) |  | 0.04 | (0.03-0.06) | |  | 0.03 | (0.01-0.05)b,e,i,j,k |  |
| CA | 0.01 | (0.01-0.02) |  | 0.01 | (0.01-0.01) |  | 0.03 | (0.02-0.05) | |  | 0.02 | (0.01-0.05) |  |
| AD | 0.01 | (0.01-0.01) |  | 0.01 | (0.01-0.01) |  | 0.04 | (0.03-0.09) | |  | 0.04 | (0.03-0.08) |  |
| OT | 0.01 | (0.01-0.02) | p= 0.461**** | 0.01 | (0.01-0.01) | p= 0.893 | 0.04 | (0.02-0.06) | | p= 0.018 | 0.03 | (0.02-0.05) | p <0.001 |
|  |  |  |  |  |  |  |  |  | |  |  |  |  |
| SHBG | 58.8 | (37.1-75.8) |  | 48.9 | (36.3-70.8) |  | 28.8 | (21.3-44.6) | |  | 33.8 | (22.9-52.5)b,e,g,i |  |
| CA | 58.5 | (38.9-79.2) |  | 50.1 | (39.8-74.1) |  | 29.2 | (22.1-46.7) | |  | 34.6 | (23.9-54.8) |  |
| AD | 47.8 | (34.8-68.0) |  | 30.2 | (28.8-50.1) |  | 26.7 | (20.6-43.3) | |  | 28.8 | (20.4-43.6) |  |
| OT | 37.3 | (24.1-44.9) | p= 0.001 | 44.6 | (35.4-56.2) | p= 0.049 | 29.9 | (20.2-44.9) | | p= 0.604 | 33.8 | (21.8-48.9) | p= 0.058 |
|  |  |  |  |  |  |  |  |  | |  |  |  |  |
| FAI (%) | 1.5 | (1.0-2.5) |  | 2.0 | (1.3-2.8) |  | 6.7 | (3.9-10.8) | |  | 5.4 | (2.5-9.3)b,e,i,j,l |  |
| CA | 1.5 | (1.0-2.4) |  | 1.8 | (1.1-2.7) |  | 6.5 | (3.5-10.8) | |  | 5.1 | (2.3-9.4) |  |
| AD | 1.4 | (0.9-3.0) |  | 2.2 | (1.8-2.5) |  | 6.8 | (5.1-11.8) | |  | 6.2 | (4.0-10.1) |  |
| OT | 2.3 | (1.9-2.7) | p= 0.150 | 2.3 | (1.8-3.7) | p= 0.250 | 7.1 | (4.9-10.6) | | p= 0.699 | 6.6 | (3.4-9.5) | p= 0.097 |
|  |  |  |  |  |  |  |  |  | |  |  |  |  |
| DHEA (nmol/l) | 13.8 | (8.5-22.4) |  | 11.7 | (8.2-18.1) |  | 15.6 | (11.2-25.1) | |  | 15.9 | (9.8-23.0)f,h,i |  |
| CA | 13.8 | (8.4-22.6) |  | 10.7 | (7.6-19.0) |  | 17.6 | (11.7-26.8) | |  | 16.6 | (9.4-24.7) |  |
| AD | 10.3 | (7.2-15.2) |  | 14.3 | (12.1-16.0) |  | 15.2 | (11.4-20.0) | |  | 14.8 | (11.7-18.8) |  |
| OT | 23.0 | (15.9-43.5) | p <0.001 | 14.9 | (9.6-18.0) | p= 0.610 | 15.2 | (11.4-23.5) | | p= 0.283 | 14.9 | (11.4-22.1) | p= 0.628 |
|  |  |  |  |  |  |  |  |  | |  |  |  |  |
| 17-OHP4 (nmol/l) | 2.3 | (1.7-3.1) |  | 2.5 | (1.8-3.9) |  | 3.4 | (2.3-4.6) | |  | 3.3 | (2.2-4.5)b,e,i,j |  |
| CA | 2.4 | (1.8-3.1) |  | 2.5 | (1.8-3.8) |  | 3.6 | (2.5-4.7) | |  | 3.3 | (2.3-4.6) |  |
| AD | 2.0 | (1.6-2.6) |  | 2.0 | (1.6-2.9) |  | 3.2 | (2.2-4.5) | |  | 3.0 | (2.0-4.3) |  |
| OT | 2.1 | (1.5-3.3) | p= 0.213 | 2.3 | (1.9-4.2) | p= 0.451 | 3.2 | (2.1-4.4) | | p= 0.060 | 3.2 | (1.9-4.2) | p= 0.156 |
|  |  |  |  |  |  |  |  |  | |  |  |  |  |
| 17-OPHE (nmol/l) | 3.4 | (1.8-7.2) |  | 2.0 | (1.4-4.6) |  | 4.0 | (1.7-7.9) | |  | 3.4 | (1.6-8.1)a,f,i,j,k |  |
| CA | 3.3 | (1.8-7.0) |  | 1.9 | (1.4-3.2) |  | 3.3 | (1.7-7.5) | |  | 3.2 | (1.5-7.5) |  |
| AD | 3.5 | (2.1-6.6) |  | 5.5 | (1.6-9.2) |  | 6.4 | (3.1-9.0) | |  | 5.9 | (2.8-9.1) |  |
| OT | 6.5 | (3.0-8.7) | p= 0.613 | 7.1 | (5.1-8.7) | p= 0.094 | 3.7 | (1.8-6.4) | | p= 0.218 | 5.4 | (2.0-7.2) | p= 0.138 |

*Results are given in median and interquatile range (IQR); CA= Caucasian, AD= African descendent, OT= Other races; **All abbreviations were given along the text; ***Kruskal-Wallis H test followed by Dunn-Bonferroni post hoc test

a= controls vs NA-PCOS, p <0.01; b= controls vs PCOS, p <0.01; c= controls vs NA-PCOS, p <0.05; d= controls vs PCOS, p <0.05; e= controls vs HA-PCOS, p <0.01; f= controls vs HA-PCOS, p <0.05; g= NA-PCOS vs PCOS, p <0.01; h= NA-PCOS vs PCOS, p <0.05; i= NA-PCOS vs HA-PCOS, p <0.01; j= NA-PCOS vs HA-PCOS, p <0.05; k= HA-PCOS vs PCOS, p <0.01; l= HA-PCOS vs PCOS, p <0.05.

****p-value compares the influence of ethnicities within each variable
